# Supplementary material
Source: MDPI journal article supplement (https://www.mdpi.com/2071-1050/11/1/80)
Supplement: s1 [file s1]

## Supplementary materials: Carbon footprint of academic air travel: a case study in Switzerland

Joachim Ciers<sup>1,4\*</sup>, Aleksandra Mandic<sup>2,4\*</sup>, Laszlo Daniel Toth<sup>1</sup>, Giel Op 't Veld<sup>3</sup>

<sup>1</sup> School of Basic Sciences, École Polytechnique Fédérale de Lausanne (EPFL), 1015 Lausanne, Switzerland

<sup>2</sup> School of Life Sciences, École Polytechnique Fédérale de Lausanne (EPFL), 1015 Lausanne, Switzerland.

<sup>3</sup> School of Computer and Communication Sciences, École Polytechnique Fédérale de Lausanne (EPFL), 1015 Lausanne, Switzerland.

<sup>4</sup> These authors contributed equally to this work

\* Correspondence: joachim.ciers@epfl.ch and amandic@hathor.xyz

**Table S1.** Used DEFRA metrics to calculate CO<sub>2</sub>e emission over the studied time period. Note that the DEFRA coefficient of year N is determined by the emissions of the aviation industry of year N, and is applied to trips executed in year N+1.

| Flight type                            | Service class | CO <sub>2</sub> e intensity (kg/km) |       |       |
|----------------------------------------|---------------|-------------------------------------|-------|-------|
|                                        |               | 2013                                | 2014  | 2015  |
| Domestic (<785 km)                     | Average       | 0.172                               | 0.155 | 0.158 |
| Short-haul international (785-3700 km) | Economy       | 0.097                               | 0.084 | 0.088 |
|                                        | Business      | 0.145                               | 0.126 | 0.132 |
| Long-haul international (>3700 km)     | First         | 0.145                               | 0.111 | 0.096 |
|                                        | Economy       | 0.087                               | 0.080 | 0.073 |
|                                        | Business      | 0.253                               | 0.231 | 0.213 |
|                                        | First         | 0.350                               | 0.318 | 0.294 |

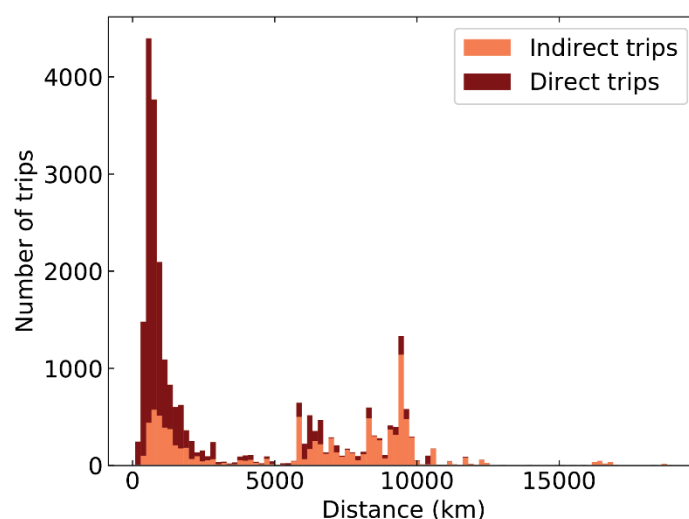

**Figure S1.** Number of direct (brown) and indirect trips (coral) as a function of distance between the departure and destination airport. Most trips that were performed are intracontinental. The intercontinental trips are mainly indirect, while the intracontinental ones are mainly direct.

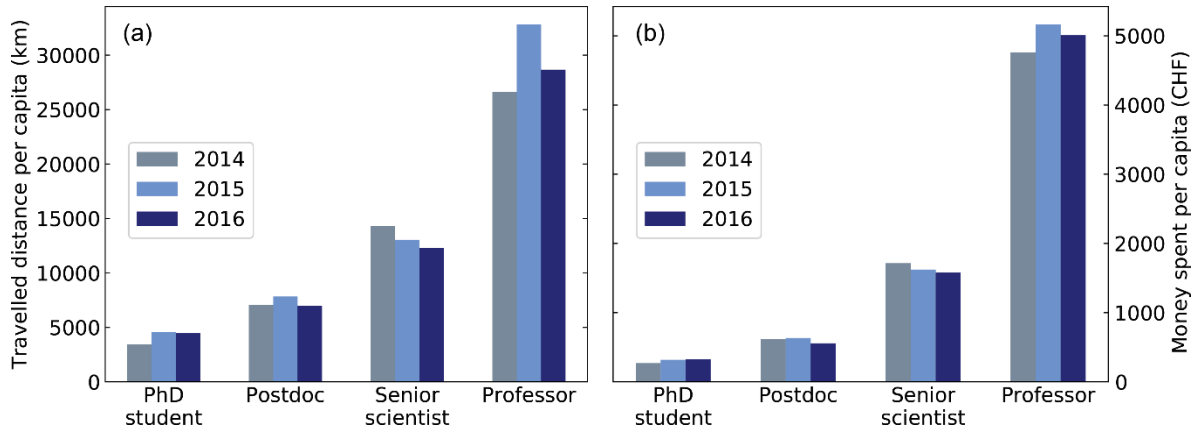

**Figure S2.** (a) Average per capita annual distance travelled by a PhD student, Postdoc, senior scientist and professor at EPFL. (b) Annual amount of money spent per capita on air travel for the same categories. These quantities also show a clear increase with seniority.

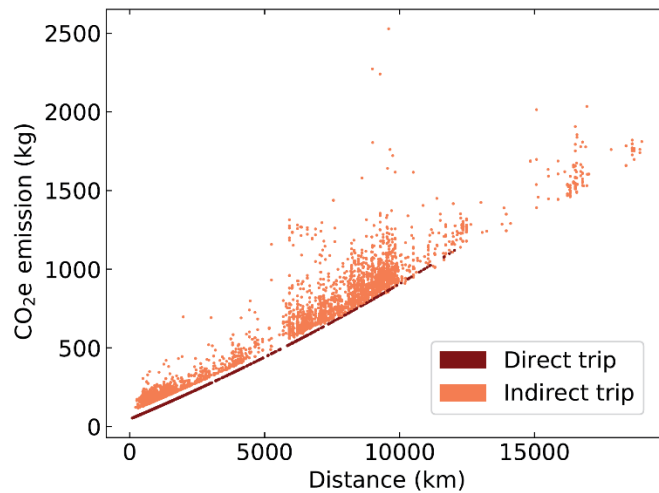

**Figure S3.** Carbon footprint of direct (brown) and indirect (coral) trips. Business and first class trips were replaced by their corresponding economy class trip to exclude the influence of service class. We see that most indirect trips cause much higher emissions compared to direct trips over the same distance.
